# Supplementary material for: Widespread hypertranscription in aggressive human cancers
Source: PubMed Central journal article supplement — Sci Adv. 2022 Nov 23;8(47):eabn0238. doi: 10.1126/sciadv.abn0238 (PMC9683723; doi:10.1126/sciadv.abn0238), 2022-11-23
Supplement: sciadv.abn0238_sm.pdf [file sciadv.abn0238_sm.pdf]

Supplementary Materials for  
**Widespread hypertranscription in aggressive human cancers**

Matthew Zatzman *et al.*

Corresponding author: Adam Shlien, [adam.shlien@sickkids.ca](mailto:adam.shlien@sickkids.ca)

*Sci. Adv.* **8**, eabn0238 (2022)  
DOI: 10.1126/sciadv.abn0238

**This PDF file includes:**

Figs. S1 to S13  
Legends for data S1 to S6

**Other Supplementary Materials for this manuscript includes the following:**

Data S1 to S6



normal cells, representing their increased RNA contribution (\*\*\*\* $p < 0.0001$ , \*\*\* $p < 0.001$ , ns = not significant, student's  $t$ -test). Boxplot center line corresponds to the median, box-limits are upper and lower quartiles, and whiskers represent  $1.5 * IQR$ . **C)** Variant allele fraction difference boxplots of copy-neutral SNP (CN-SNP), LOH-SNP, and somatic substitution variants of each cell line used in either cell mixtures, or purified cell lines split by missense and silent variant types. Both missense and silent tumor markers (subs and LOH-SNP) increase their VAF RNA relative to DNA (\*\*\*\* $p < 0.0001$ , \*\*\* $p < 0.001$ , ns = not significant, student's  $t$ -test). Boxplots are defined in Supplemental Figure 1B. **D)** Proportion of bootstrapped results within 1-fold difference of RNAmP's estimates using the full sample variant set. **E)** Boxplots depicted the difference between bootstrapped results and RNAmP's estimates using the full sample variant set. **F)** Left – Western blot of Myc induction in UW228 medulloblastoma cells. Right – qRT-PCR for Myc mRNA expression. Error bars correspond to SD.

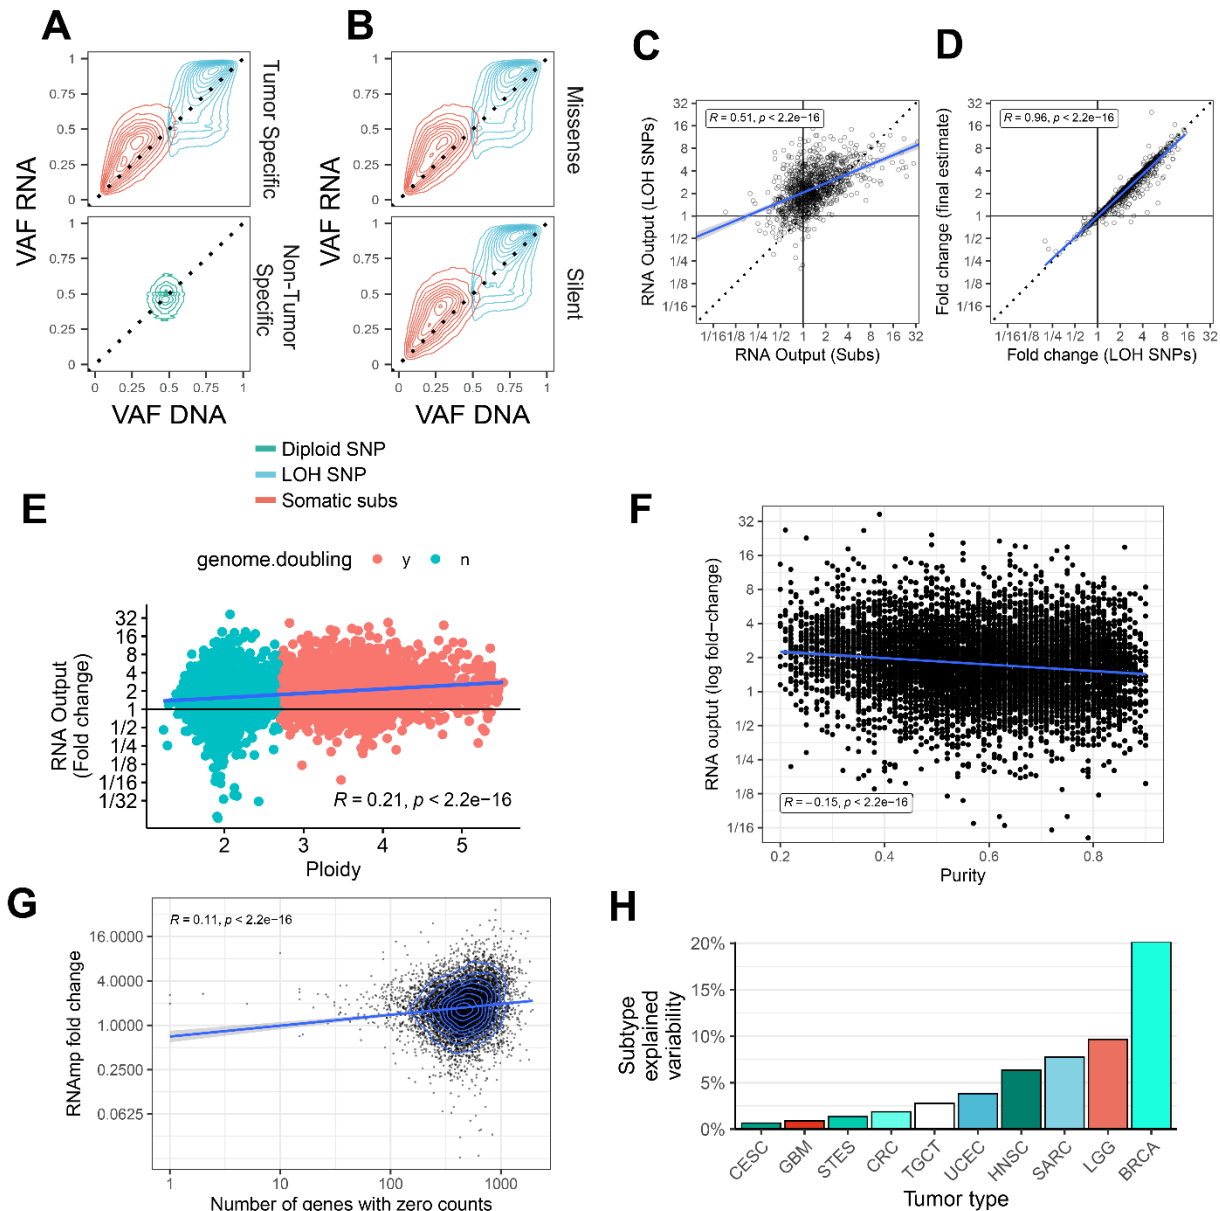

**Fig. S2.**

**RNAm applied to the TCGA cohort. A)** DNA and RNA variant allele fraction distributions for tumor specific (LOH SNPs and Subs) and non-tumor specific variant types (diploid SNPs) in the human pan-cancer dataset. Tumor specific variants have increased VAF RNA relative to DNA. **B)** Missense and silent mutation DNA and RNA variant allele fraction density distributions in the human pan-cancer dataset. Missense and silent mutations have comparable VAF DNA and RNA profiles. **C)** Correlation between RNAm fold-change results using somatic substitutions (Subs) or LOH-SNPs. **D)** Correlation between RNAm fold-change results using LOH-SNPs and the final weighted estimate using both LOH-SNPs and substitutions. **E)** Pearson correlation between tumor ploidy and RNA output ( $R = 0.21, p < 2.2e-16$ ). **F)** Pearson correlation between tumor purity and RNA output ( $R = -0.15, p < 2.2e-16$ ). **G)** Pearson

correlation between number of genes with zero counts within a sample and RNA output ( $R = 0.11$ ,  $p < 2.2e-16$ ). **H)** The proportion of variability in RNA output explained within cancers by the differences in tumor subtypes

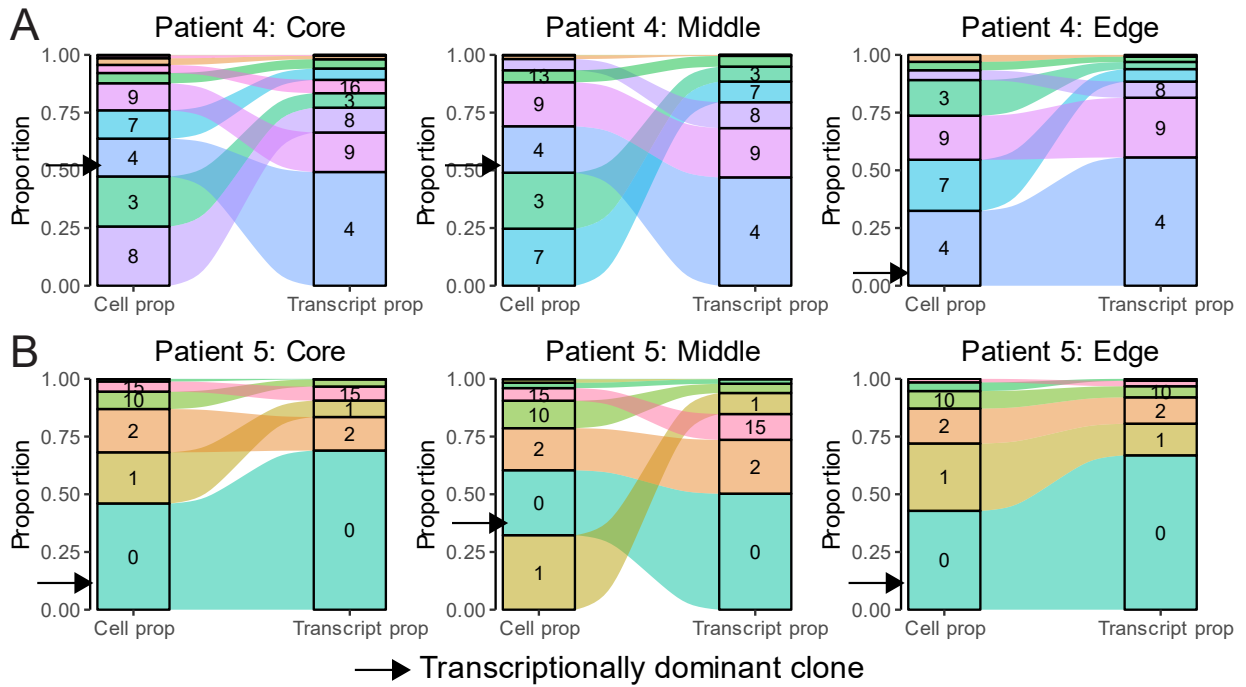

**Fig. S3.**

**Hypertranscription in single tumor cell populations.** Flow diagram depicting the proportional cell counts and transcript counts for different tumor subclusters across spatially distinct tumor regions from (A) patient 4 and (B) patient 5. Arrows indicate transcriptionally dominant clones.

Hypertranscription Association Score

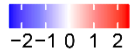

**A**

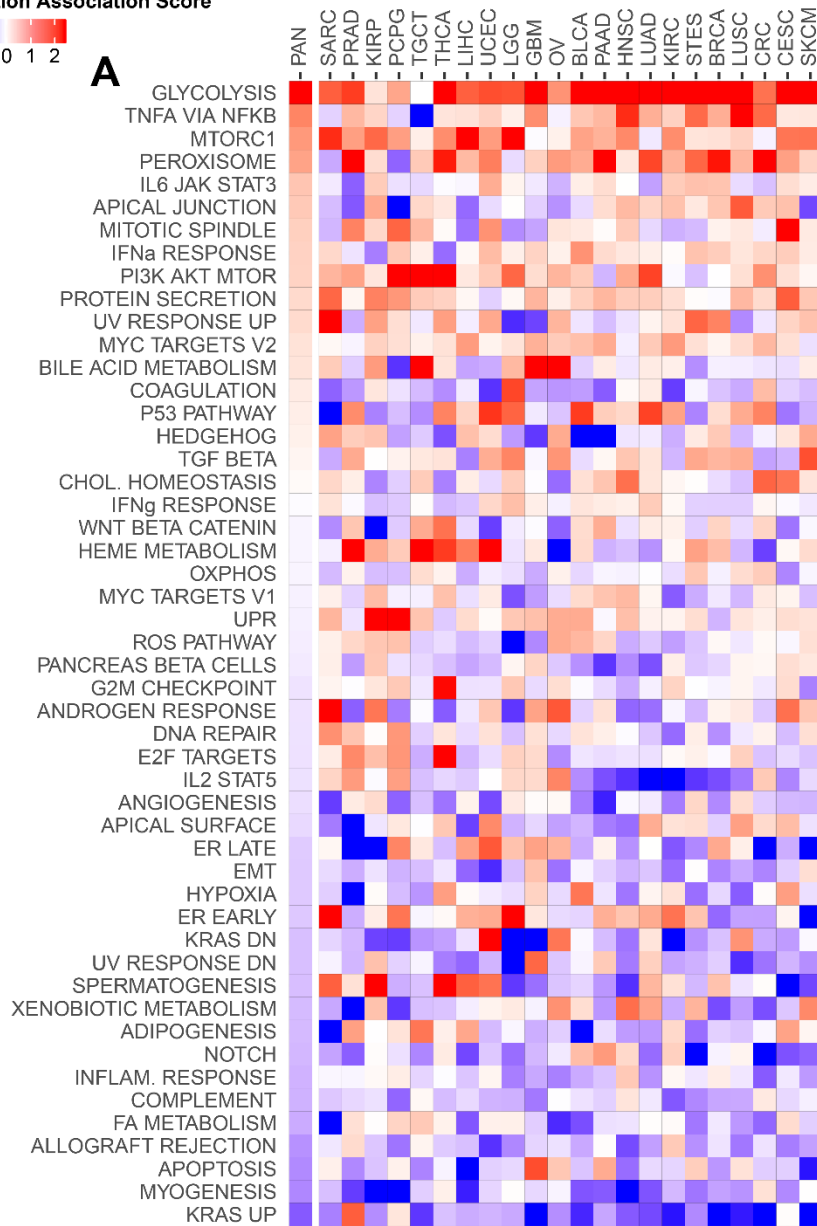

**B**

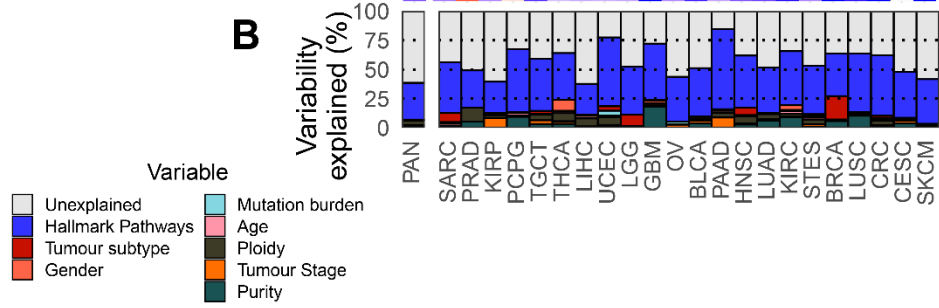

**Fig. S4.**

**Hallmark expression pathways associated with RNA output.** **A)** Heatmap depicting the association between hallmark expression pathways and RNA output in the pan-cancer cohort, and within individual tumor types. Each box represents the ridge regression coefficient representing the relationship between a pathway's level of relative expression, and global transcriptional output. **B)** The proportion of variability in RNA output explained including hallmark pathway expression data.



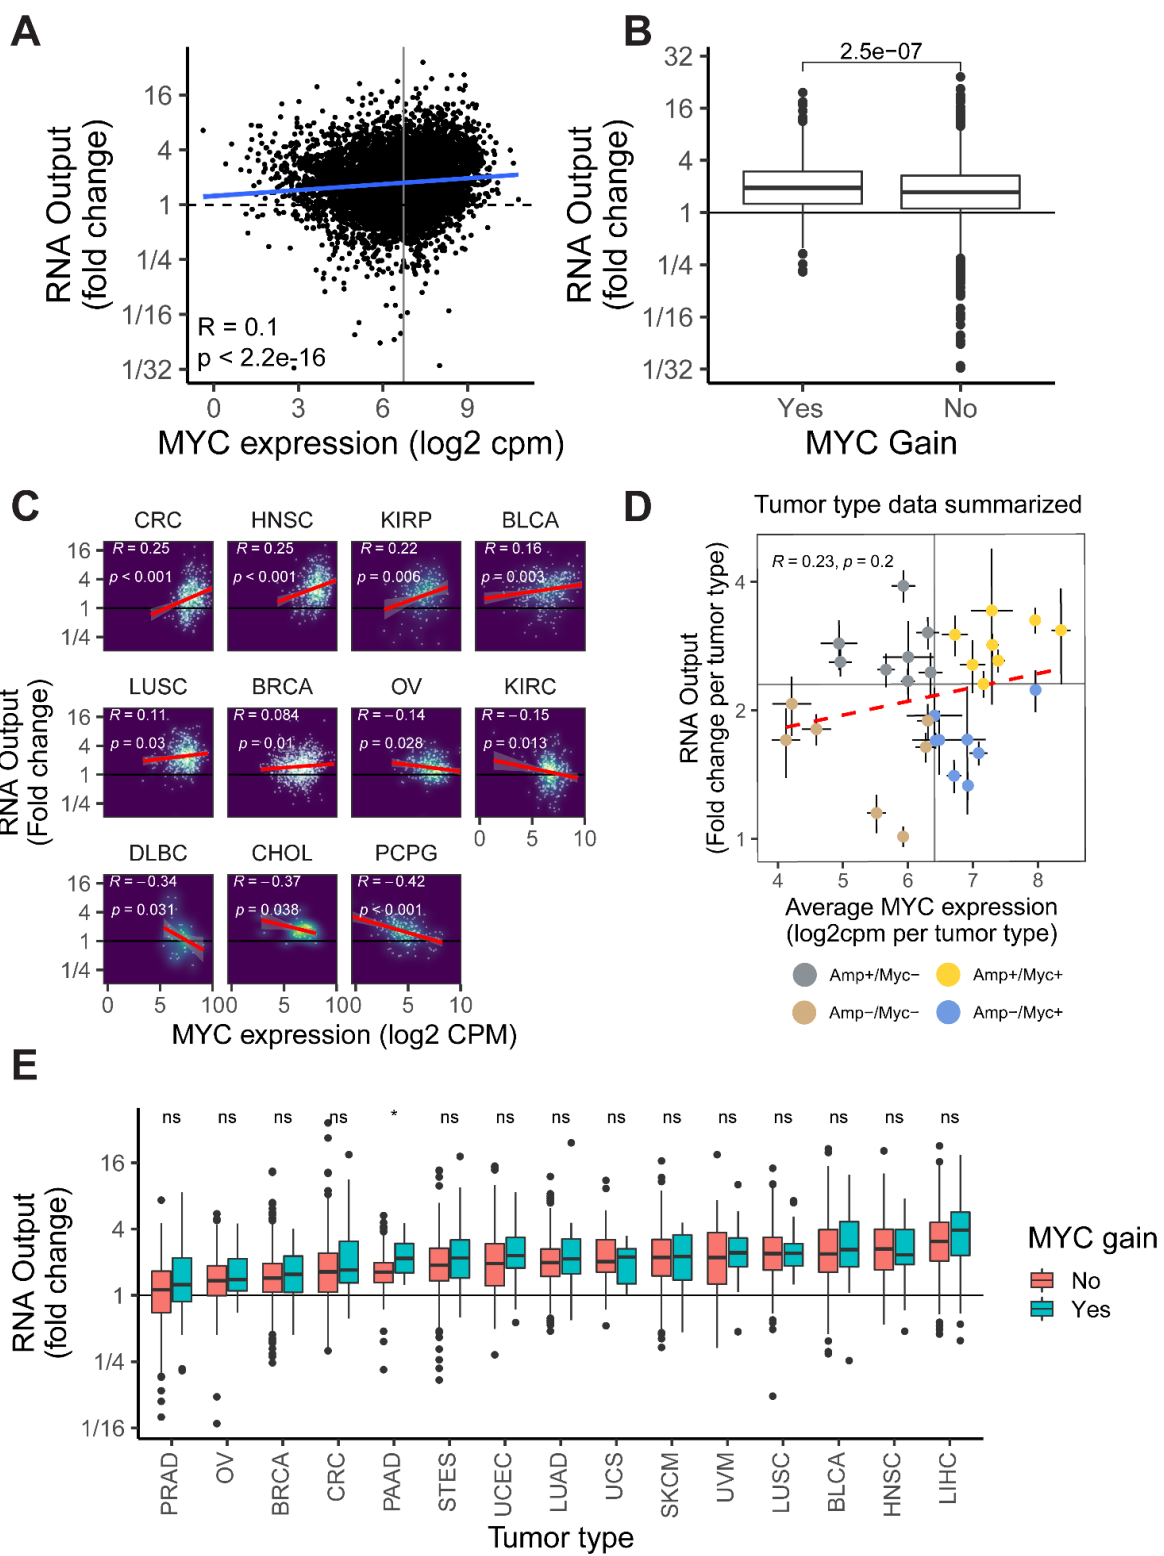

**Fig. S5.**

**Relationship between MYC expression or copy status and RNA output.** **A)** Pearson correlation between MYC gene expression and RNA output ( $R = 0.1$ ,  $p < 2.2e-16$ ). **B)** Boxplot depicting RNA output levels of tumors with and without MYC copy gains ( $p = 2.5e-07$ , student's two-sided  $t$ -test). Boxplots are defined in Supplemental Figure 1B. **C)** Pearson correlation between MYC expression and RNA output in individual tumor types. Only tumors with a statistically significant ( $p < 0.05$ ) positive or negative correlation are shown. **D)** Pearson correlation between tumor type average MYC expression and RNA output. Vertical and horizontal lines indicate median MYC expression and RNA output respectively. Each point represents a single tumor type, with 95% confidence intervals for RNA output and MYC expression measure shown as lines extended from each point ( $R = 0.23$ ,  $p = 0.2$ ). Boxplots are defined in Supplemental Figure 1B. **E)** Boxplots depicting RNA output of samples with or without MYC copy gains in individual tumor types (\* $p < 0.05$ , ns = not significant, student's  $t$ -test).

**A**

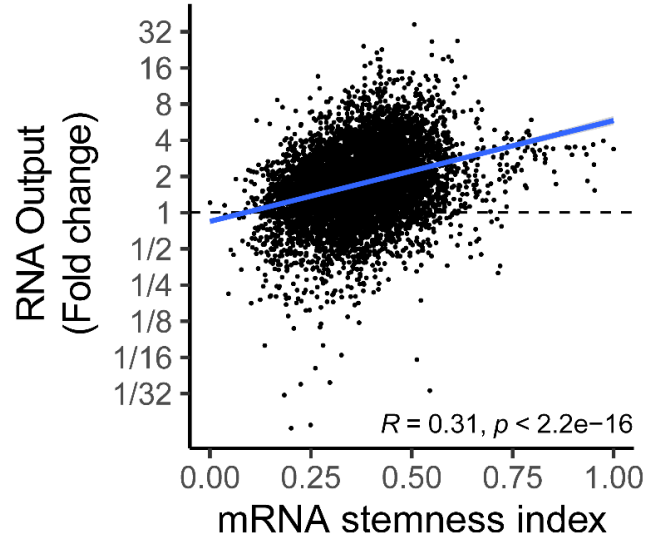

**B**

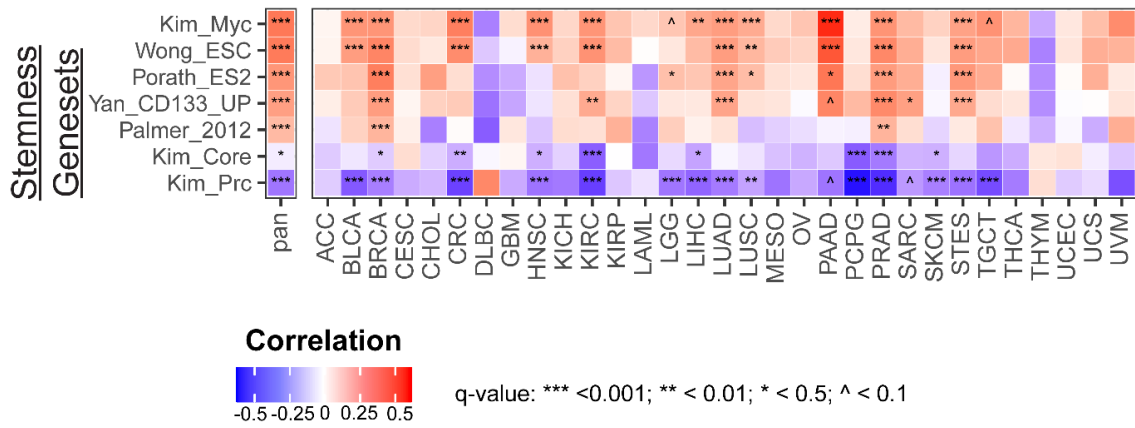

**C**

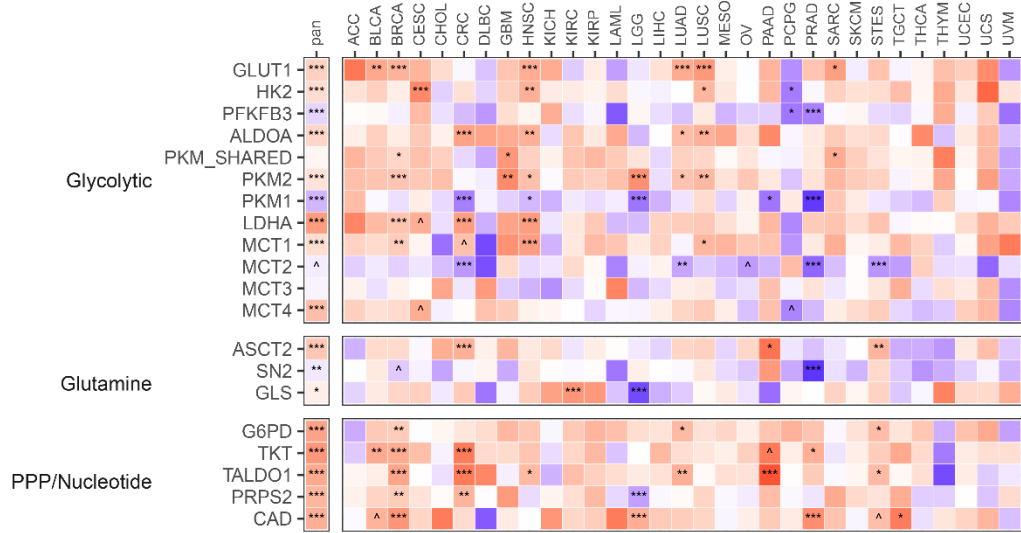

**D**

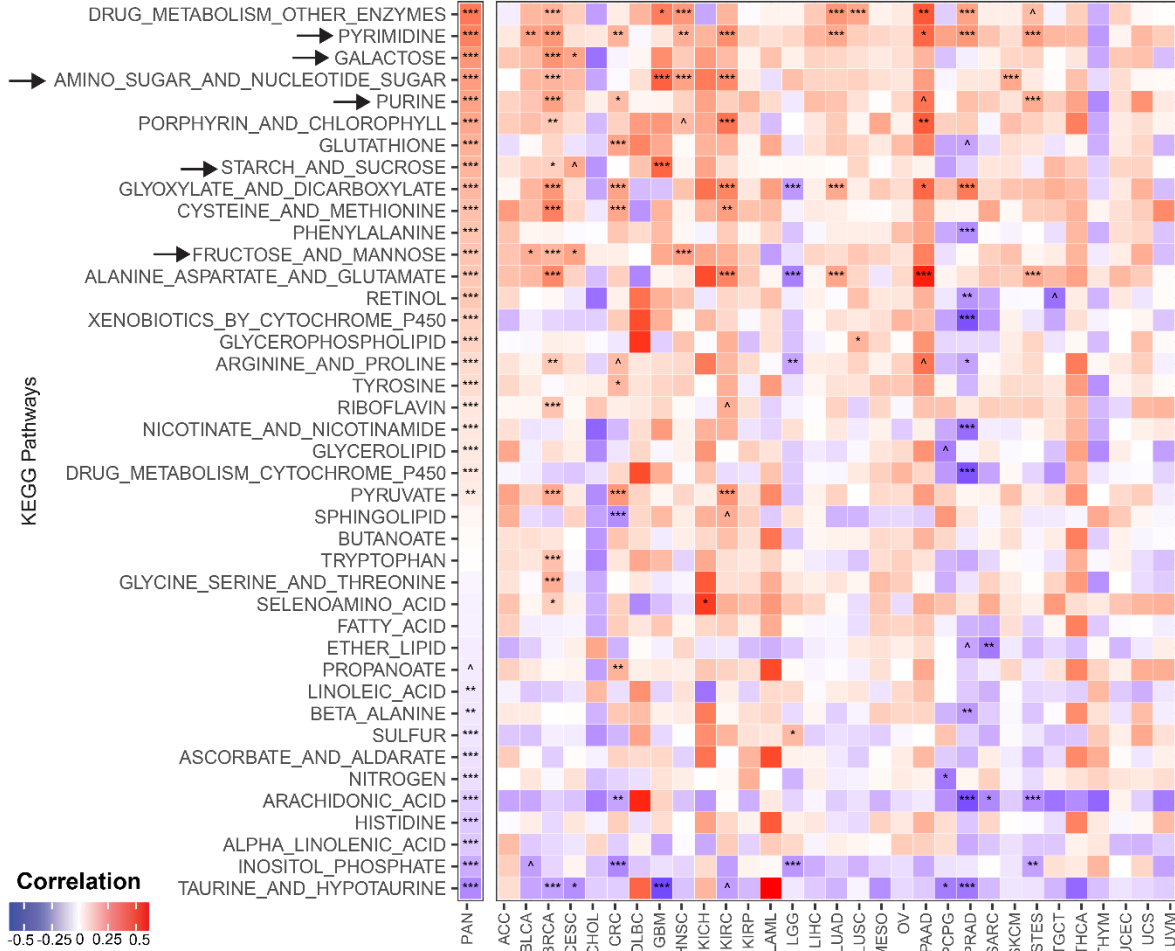

q-value: \*\*\* < 0.001; \*\* < 0.01; \* < 0.5; ^ < 0.1

**Fig. S6.**

**Metabolic and stemness pathways associated with RNA output.** **A)** Pearson correlation between mRNA stemness index scores and RNA output ( $R=0.31$ ,  $p < 2.2e-16$ ). **B)** Heatmap depicting the Pearson correlation values for stemness gene-sets and RNA output. **C)** Heatmap depicting the Pearson correlation between metabolic genes and RNA output. **D)** Heatmap depicting the Pearson correlation between KEGG metabolic pathways and RNA output. For figures 1B-D, significant correlations between RNA output and the respective gene or pathways are indicated (after FDR correction).

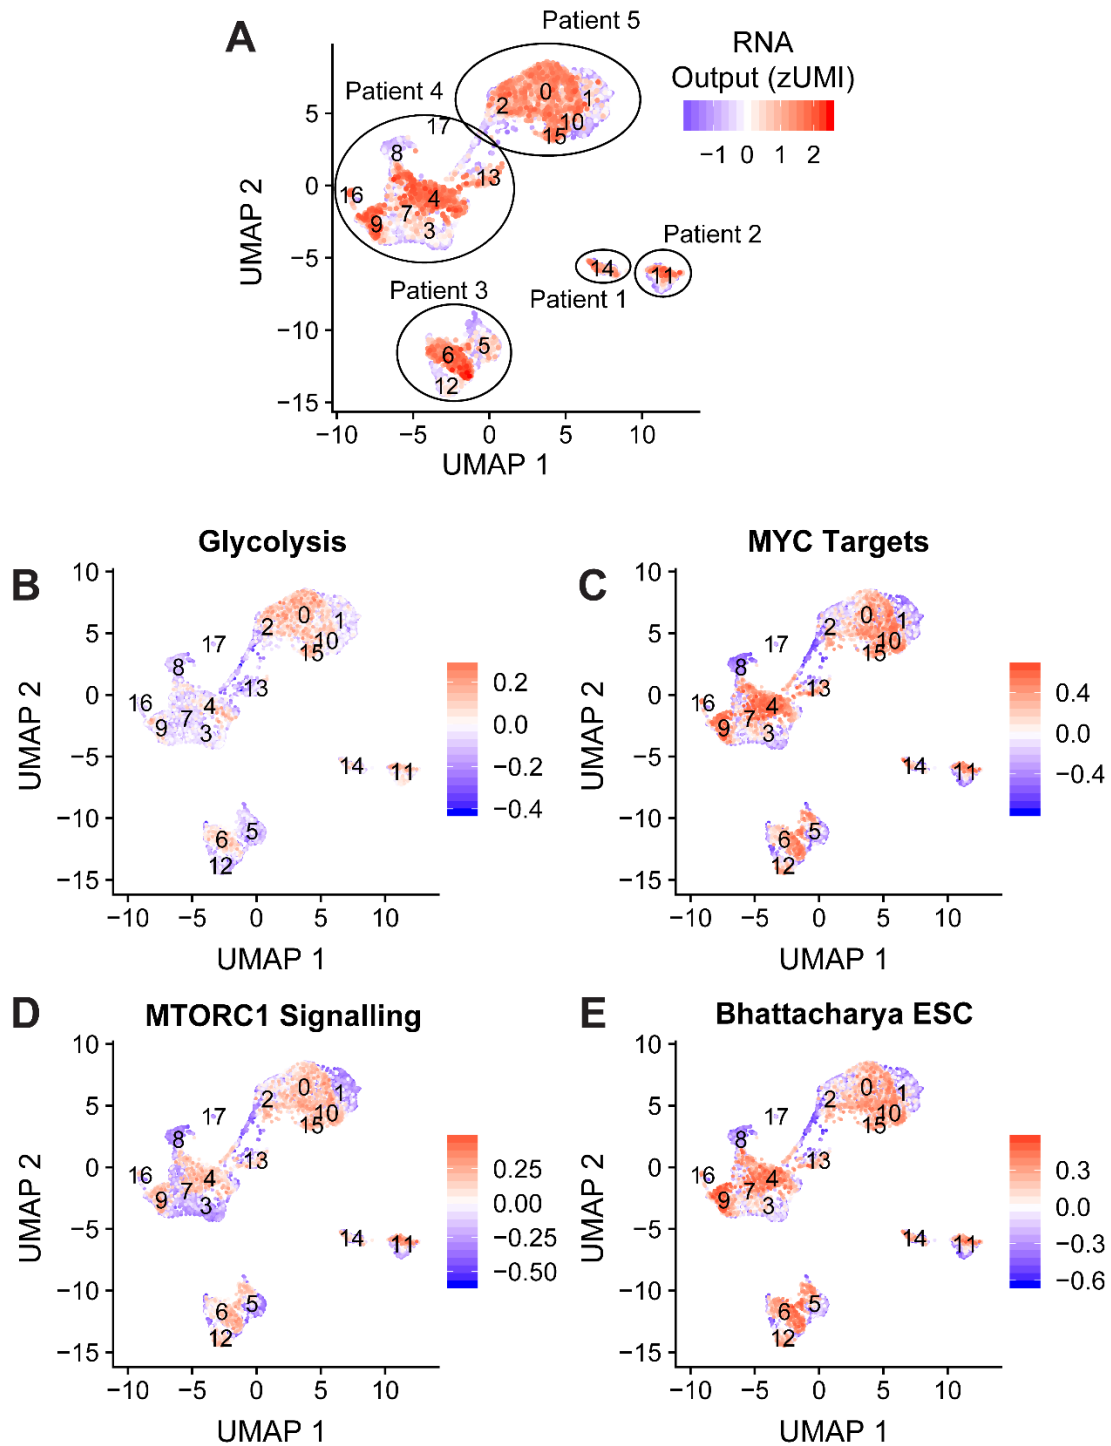

**Fig. S7.**

**Gene expression pathways associated with RNA output in single cells. A)** RNA output of single-cells overlaid onto the UMAP expression clusters. **B-E)** Expression levels for glycolysis, MYC targets, MTORC1 and ESC signaling pathways overlaid onto the tumor cell UMAP.

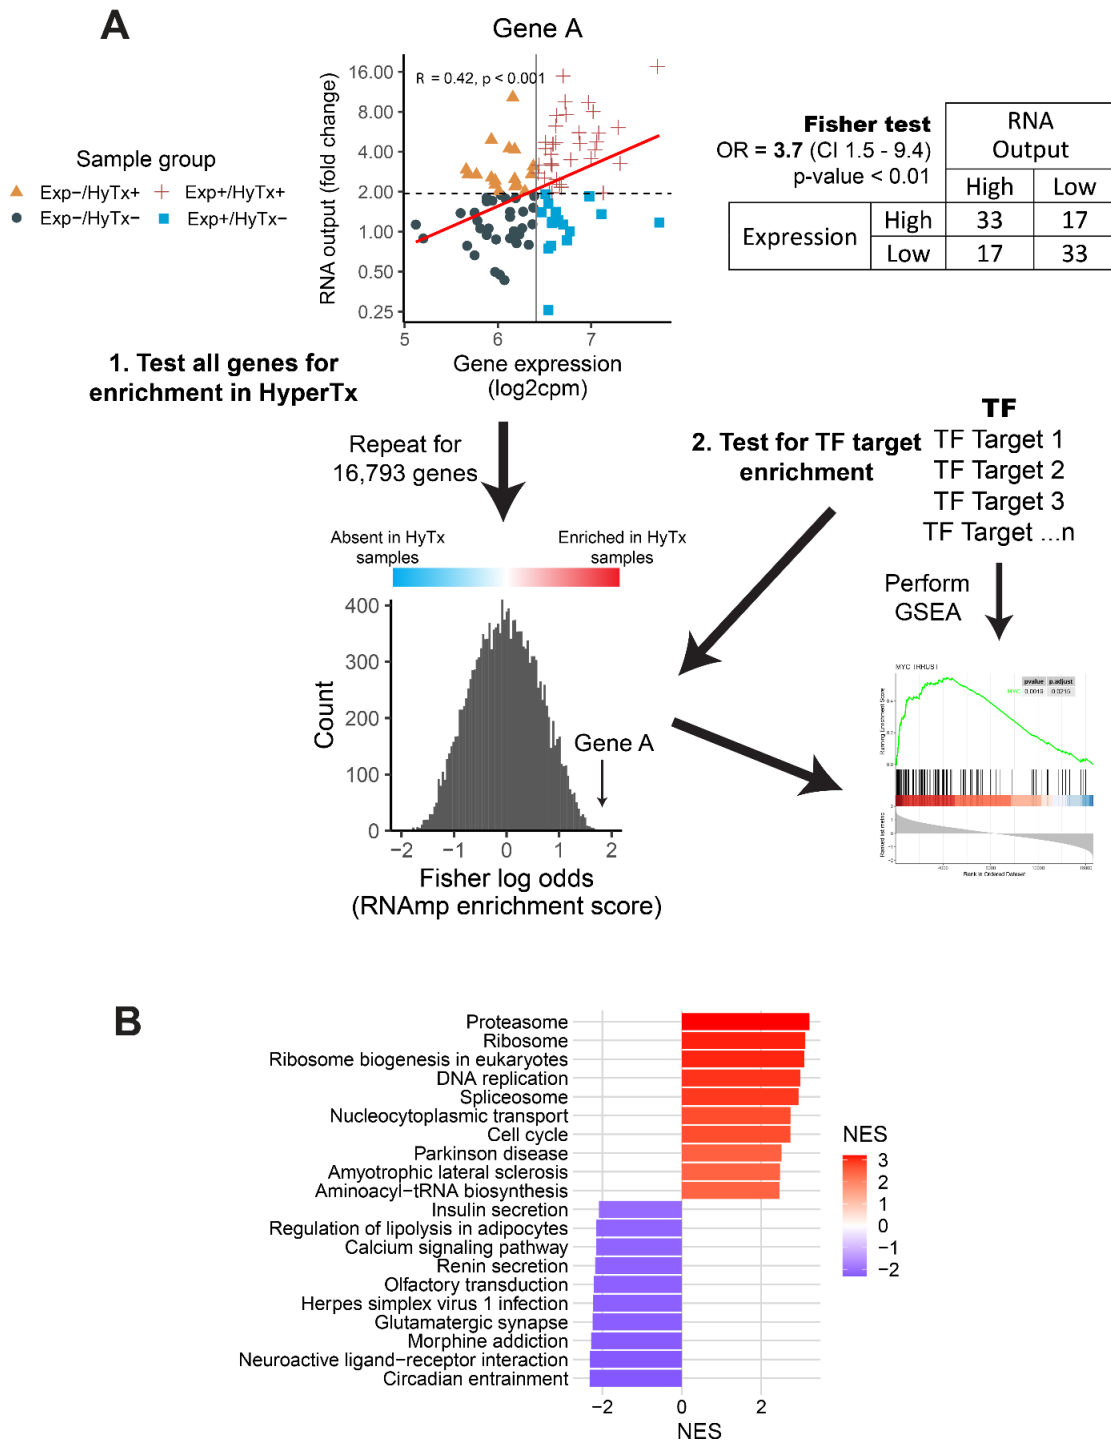

**Fig. S8.**

**Method for determining specific transcription factor regulators of hypertranscription. A)** To find genes regulating RNA output, first all genes are scored by Pearson correlation and fisher test to assess each genes' relationship with RNA output. The resulting distribution of odds ratio

(OR) is used to test enrichment of transcription factors (TFs) and their targets using gene-set enrichment analysis (GSEA). Putative drivers are filtered for those where both the transcription factor targets and the transcription factor itself are either highly enriched or depleted in the hypertranscriptional state. **B)** Barplot depicting the normalized enrichment score (NES) for the top-10 and bottom-10 most enriched KEGG pathways in the pan-cancer Fisher's log odds distribution for hypertranscriptional genes (in **A**).



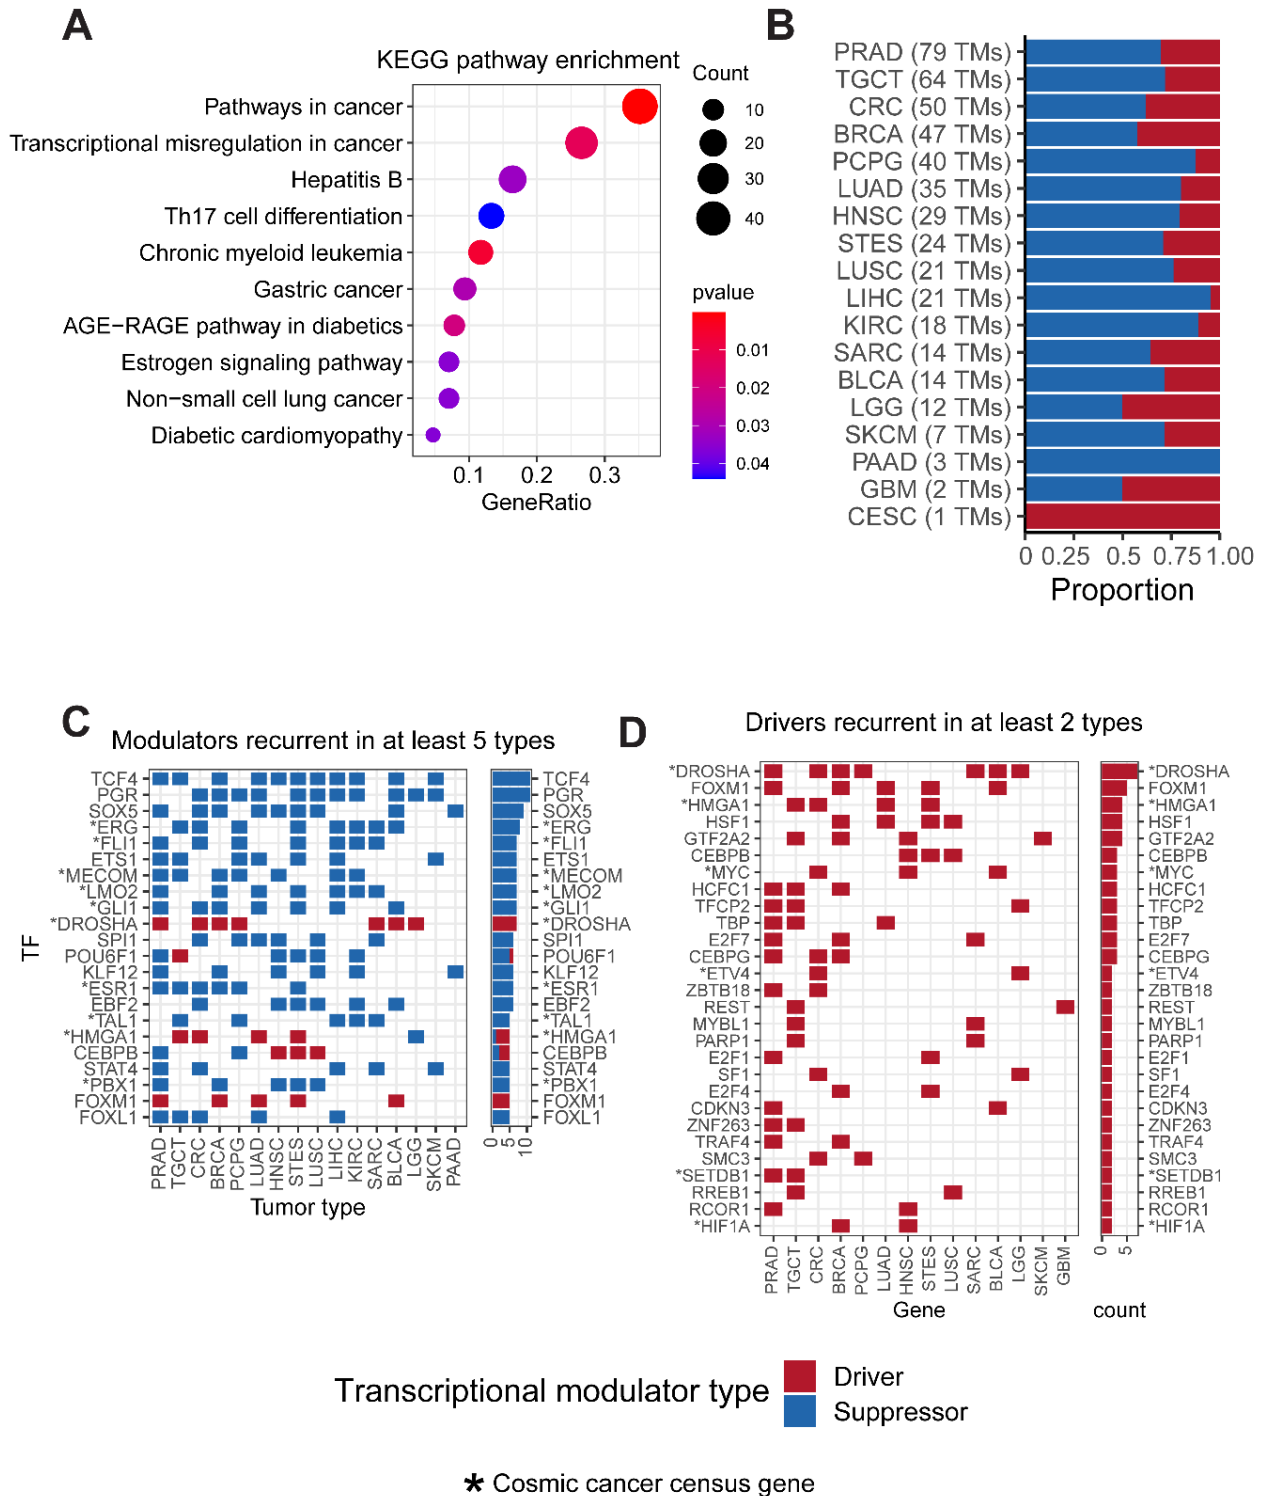

**Fig. S9.**

**Regulators of RNA output in cancer.** **A)** KEGG pathway enrichment for transcription factors found to regulate RNA output. **B)** Proportion of transcriptional modulators in each tumor type colored by their correlation to RNA output. **C)** Plot depicting genes found to regulate RNA

output in at least 5 tumor types, colored by TM correlation with RNA output. **D)** Positive TMs found in at least 2 tumor types. Cosmic cancer census genes are indicated by gene names with an asterisk (\*).

### Pan-cancer Cox Adjusted Survival

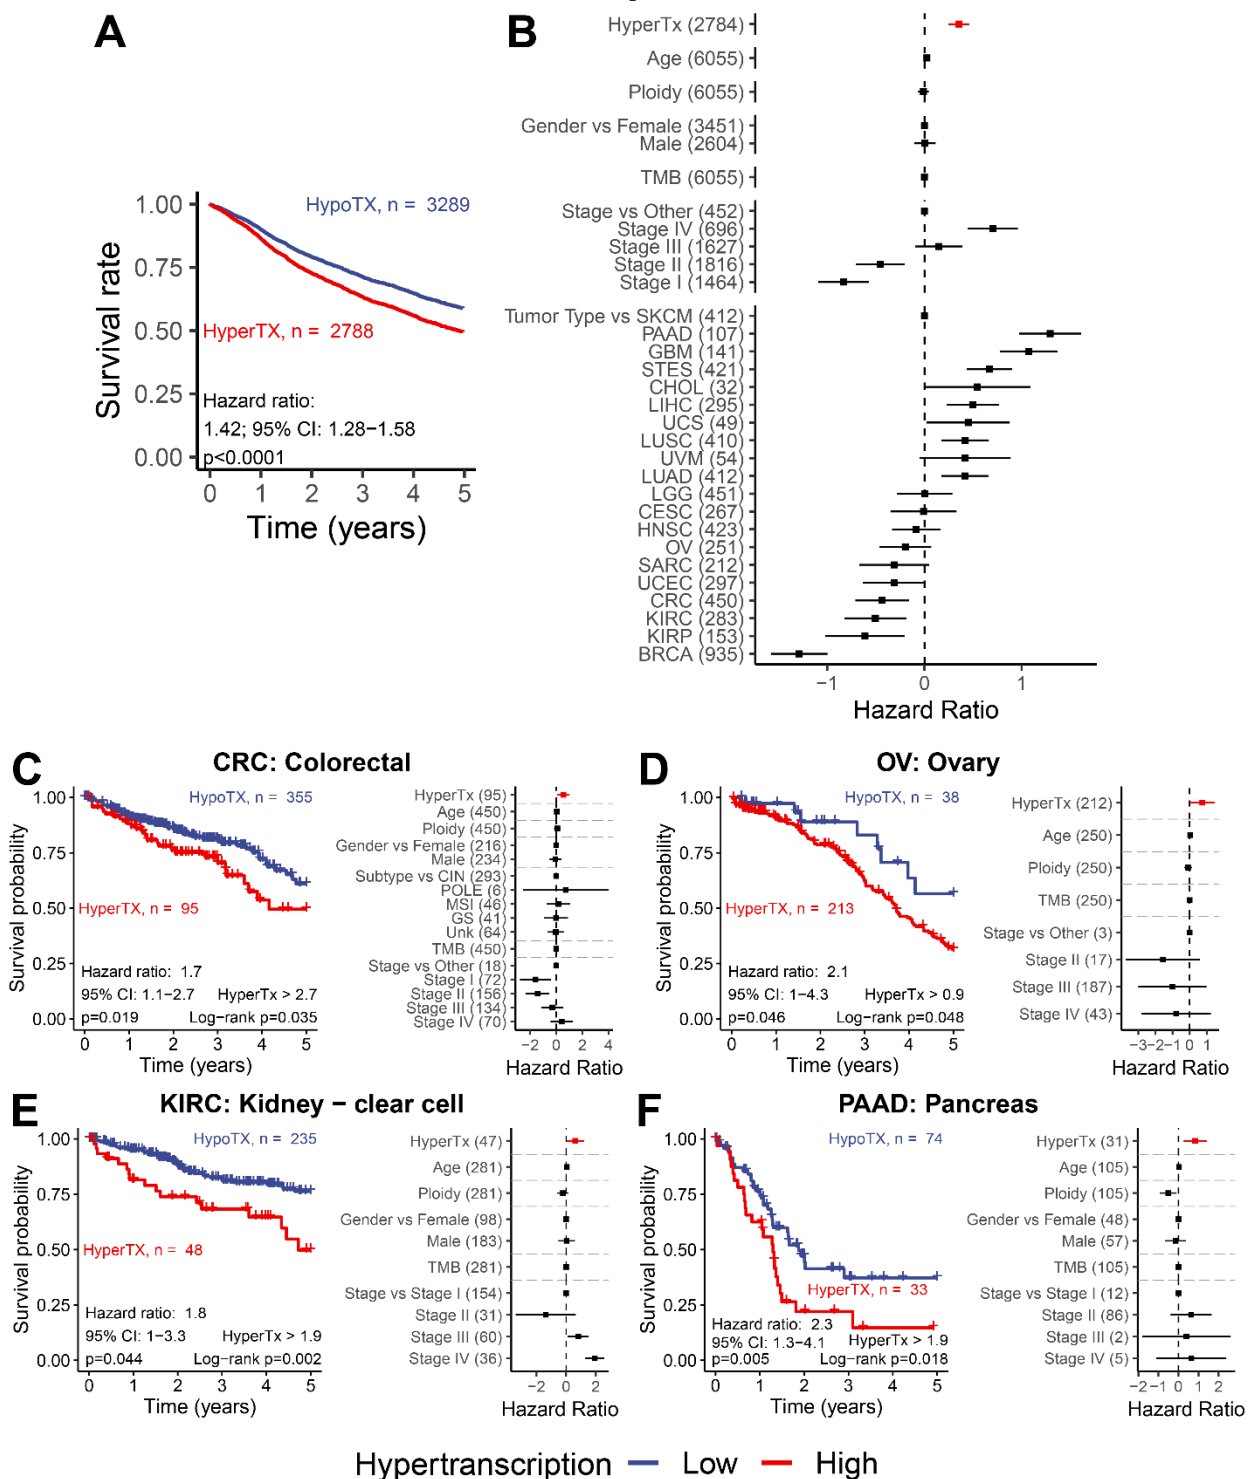

Fig. S10.

**Prognostically significant hypertranscriptional subgroups in cancer.** **A)** Cox adjusted survival curves for hyper- and hypotranscriptional groups in the pan-cancer cohort. **B)** Forest plot showing hazard ratios for the pan-cancer cox regression model. **C-F)** Kaplan-Meier survival plots (left) and Cox regression model hazard ratios (right) for hyper- and hypotranscriptional subgroups in **C)** colorectal carcinoma, **D)** ovarian cancer, **E)** kidney renal clear cell carcinoma and **F)** pancreatic adenocarcinoma. *Error bars on all hazard ratio coefficients represent the 95% CI.*

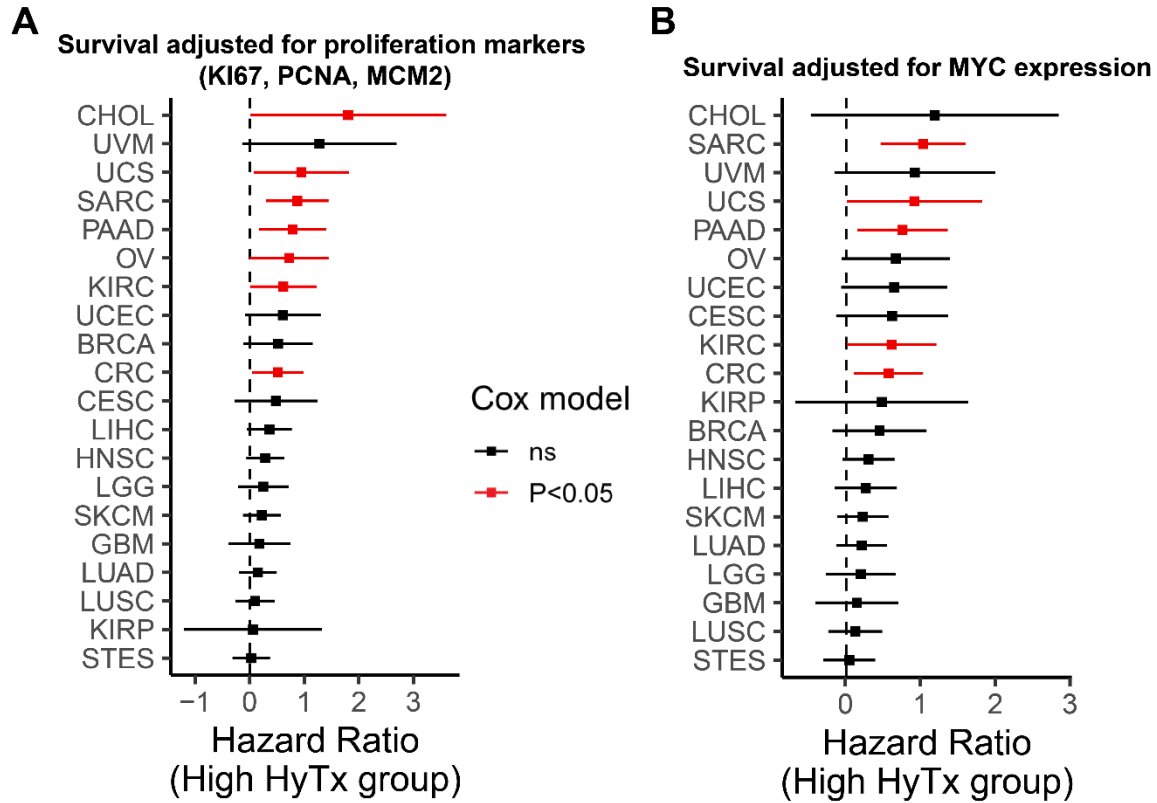

**Fig. S11.**

**Analysis of RNA output and survival in cancer types accounting for proliferation associated markers.** **A)** Hazard ratios for hypertranscriptional subgroups across cancer types while accounting for expression of proliferation associated markers KI67, PCNA, and MCM2 or **B)** MYC. Error bars on all hazard ratio coefficients represent the 95% CI.

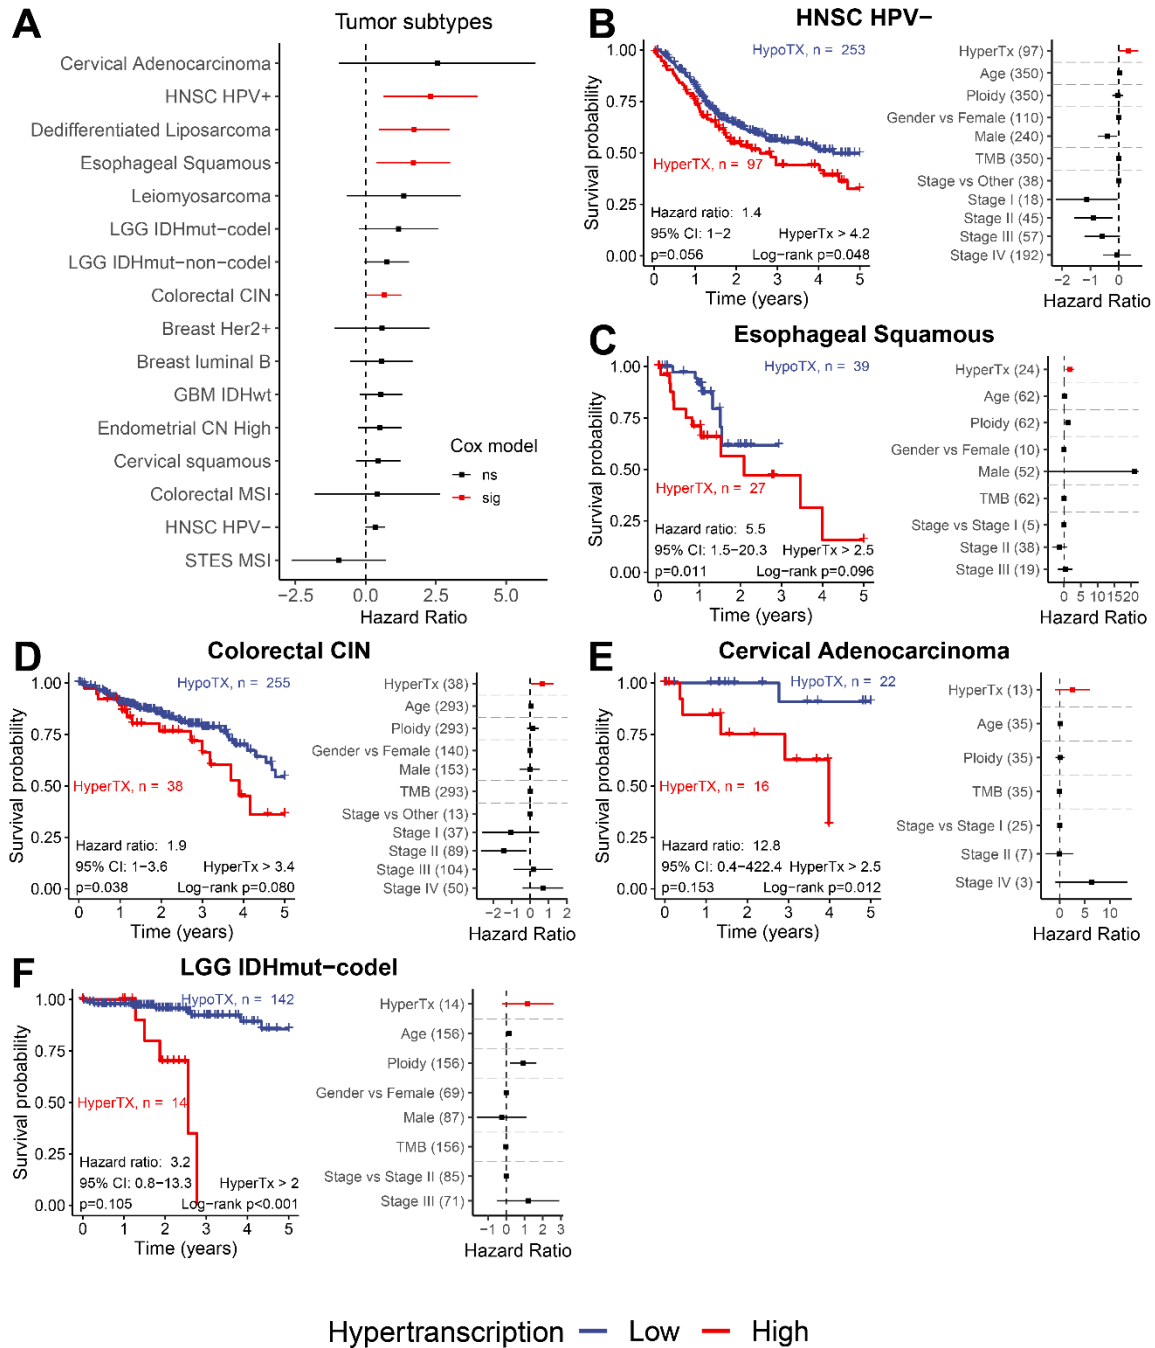

**Fig. S12.**

**Analysis of RNA output and survival in additional cancer subtypes. A)** Hazard ratios for hypertranscriptional subgroups across cancer subtypes. **B-F)** Kaplan-Meier survival plots (left) and Cox regression model hazard ratios (right) for hyper- and hypotranscriptional subgroups in

**B)** HPV- head and neck squamous cell carcinoma, **C)** esophageal squamous cell carcinoma, **D)** chromosomal instable colorectal carcinoma, **E)** cervical adenocarcinoma, **F)** IDHmutant-codel low grade glioma. *Error bars on all hazard ratio coefficients represent the 95% CI.*

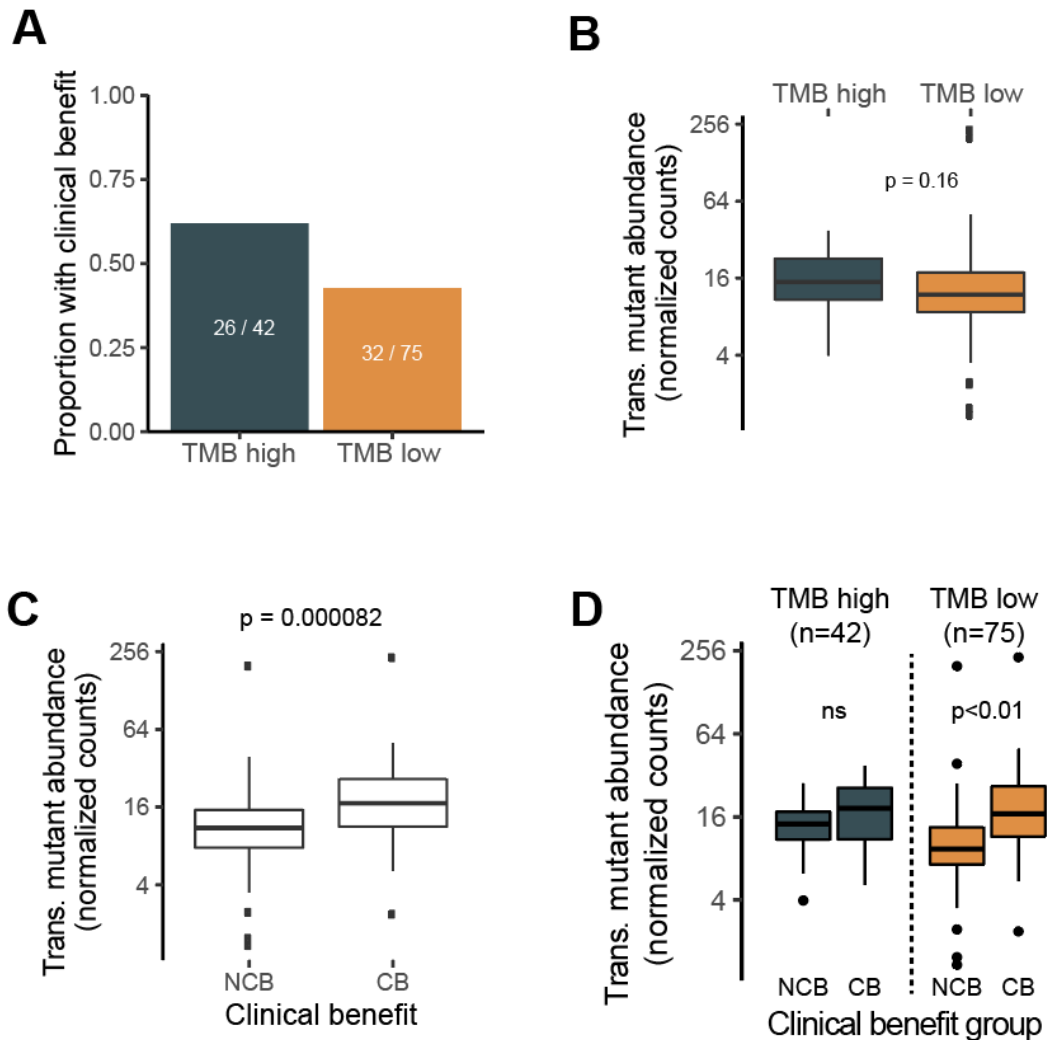

**Fig. S13.**

**Transcriptional mutation abundance and ICI response.** **A)** Proportion of patients with clinical benefit from ICI in either high or low TMB groups. TMB high is defined as greater than 10 mutations per megabase. **B)** Average transcriptional mutation abundance of TMB high and TMB low ICI patients (student's *t*-test,  $p=0.16$ ). **C)** Average transcriptional mutation abundance of ICI patients with and without clinical benefit to ICI. Patients with clinical benefit have significantly increase average mutation abundance (student's *t*-test,  $p = 0.000082$ ). **D)** Average transcriptional mutation abundance of ICI patients with and without clinical benefit to ICI split by TMB high and low groups. TMB low patients have significantly increase expression of their mutations. CB = clinical benefit. NCB = no clinical benefit. Boxplots are defined in Supplemental Figure 1B.



**Data S1. (separate file)**

TCGA sample numbers analyzed by RNAmP.

**Data S2. (separate file)**

Cohort hypertranscription measures.

**Data S3. (separate file)**

Proportion of variability explained in hypertranscription by various features

**Data S4. (separate file)**

Ranking of hallmark pathways associated with hypertranscription

**Data S5. (separate file)**

Putative regulators of RNA output across cancers.

**Data S6. (separate file)**

TCGA and GTEx analysis sample and gene numbers
